# Supplementary material
Source: Elsevier journal article supplement (https://www.sciencedirect.com/science/article/pii/S1885585720304278)
Supplement: mmc1 [file mmc1.pdf]

## MATERIAL ADICIONAL

Asociación entre índice tobillo-brazo y rendimiento cognitivo en participantes del estudio PREDIMED-Plus: estudio transversal

### Tabla 1 del material adicional

Asociación entre categorías de índice tobillo-brazo (ITB) y habilidades cognitivas medidas con pruebas neuropsicológicas

|                | Mini-mental Test |            |       | Fluencia verbal fonética |            |       | Fluencia verbal semántica |            |       | Memoria de trabajo |            |       | Test del trazo |            |       | Test del reloj |            |       |
|----------------|------------------|------------|-------|--------------------------|------------|-------|---------------------------|------------|-------|--------------------|------------|-------|----------------|------------|-------|----------------|------------|-------|
|                | $\beta$          | $\eta_p^2$ | p     | $\beta$                  | $\eta_p^2$ | p     | $\beta$                   | $\eta_p^2$ | p     | $\beta$            | $\eta_p^2$ | p     | $\beta$        | $\eta_p^2$ | p     | $\beta$        | $\eta_p^2$ | p     |
| ITB $\leq 0,9$ | –                | <          | 0,976 | 0,297                    | <          | 0,365 | 0,701                     | 0,001      | 0,048 | 0,230              | <          | 0,498 | –              | <          | 0,337 | –              | <          | 0,358 |
| ITB            | 0,004            | 0,001      |       | 0                        | 0,001      |       | 0                         |            |       | 0                  | 0,001      |       | 6,453          | 0,001      |       | 0,089          | 0,001      |       |
| > 0,9-< 1,4    | 0                |            |       | (ref.)                   |            |       | (ref.)                    |            |       | (ref.)             |            |       | 0              |            |       | 0              |            |       |
|                | (ref.)           |            |       |                          |            |       |                           |            |       |                    |            |       | (ref.)         |            |       | (ref.)         |            |       |

ITB: índice tobillo-brazo; ref.: categoría de referencia.

Modelo lineal general ajustado por edad, sexo y años de educación.  $\beta$  representa el cambio en cada prueba neuropsicológica en aquellos con ITB  $\leq 0,9$ , indicador de enfermedad arterial periférica, tomando como referencia la categoría de ITB > 0,9-< 1,4 (se excluyó a aquellos con ITB  $\geq 1,4$ ).  $\eta_p^2$  representa el tamaño del efecto.

**Tabla 2 del material adicional**

Asociación entre categorías de índice tobillo-brazo (ITB), factores de riesgo cardiovascular y habilidades cognitivas medidas con pruebas neuropsicológicas

|                                      | Mini-mental Test         |            |           | Fluencia verbal fonética |            |           | Fluencia verbal semántica |            |       | Memoria de trabajo       |            |       | Test del trazo                |            |       | Test del reloj            |            |       |
|--------------------------------------|--------------------------|------------|-----------|--------------------------|------------|-----------|---------------------------|------------|-------|--------------------------|------------|-------|-------------------------------|------------|-------|---------------------------|------------|-------|
|                                      | $\beta$                  | $\eta_p^2$ | p         | $\beta$                  | $\eta_p^2$ | p         | $\beta$                   | $\eta_p^2$ | p     | $\beta$                  | $\eta_p^2$ | p     | $\beta$                       | $\eta_p^2$ | p     | $\beta$                   | $\eta_p^2$ | p     |
| ITB $\leq 0,9$<br>ITB<br>> 0,9-< 1,4 | 0,00<br>2<br>0<br>(ref.) | <<br>0,001 | 0,99<br>0 | 0,30<br>3<br>0<br>(ref.) | <<br>0,001 | 0,35<br>6 | 0,68<br>9<br>0<br>(ref.)  | 0,001      | 0,053 | 0,24<br>7<br>0<br>(ref.) | <<br>0,001 | 0,466 | –<br>6,63<br>9<br>0<br>(ref.) | <<br>0,001 | 0,323 | –<br>0,092<br>0<br>(ref.) | <<br>0,001 | 0,344 |
| PAS<br>(mmHg)                        | –<br>0,00<br>1           | <<br>0,001 | 0,35<br>7 | –<br>0,00<br>2           | <<br>0,001 | 0,64<br>5 | –<br>0,00<br>2            | <<br>0,001 | 0,566 | –<br>0,00<br>1           | <<br>0,001 | 0,887 | –<br>0,08<br>9                | <<br>0,001 | 0,218 | <<br>0,001                | <<br>0,001 | 0,681 |
| Cintura<br>(cm)                      | –<br>0,00<br>3           | <<br>0,001 | 0,26<br>1 | –<br>0,00<br>4           | <<br>0,001 | 0,51<br>5 | 0,00<br>7                 | <<br>0,001 | 0,358 | –<br>0,01<br>0           | 0,001      | 0,166 | 0,44<br>9                     | 0,002      | 0,001 | 0,002                     | <<br>0,001 | 0,411 |

|                  |                |       |                |                |       |                |                |       |            |                |            |       |            |       |            |            |            |       |
|------------------|----------------|-------|----------------|----------------|-------|----------------|----------------|-------|------------|----------------|------------|-------|------------|-------|------------|------------|------------|-------|
| Diabetes<br>(sí) | –<br>0,24<br>6 | 0,003 | <<br>0,00<br>1 | –<br>0,67<br>2 | 0,005 | <<br>0,00<br>1 | –<br>0,73<br>3 | 0,005 | <<br>0,001 | –<br>0,05<br>9 | <<br>0,001 | 0,466 | 11,8<br>31 | 0,004 | <<br>0,001 | –<br>0,056 | <<br>0,001 | 0,186 |
|------------------|----------------|-------|----------------|----------------|-------|----------------|----------------|-------|------------|----------------|------------|-------|------------|-------|------------|------------|------------|-------|

ITB: índice tobillo-brazo, PAS: presión arterial sistólica; ref.: categoría de referencia.

Modelo lineal general ajustado por edad, sexo y años de educación.  $\beta$  representa el cambio en cada prueba neuropsicológica en aquellos con  $ITB \leq 0,9$ , indicador de enfermedad arterial periférica, tomando como referencia la categoría de  $ITB > 0,9$ -< 1,4 (se excluyó a aquellos con  $ITB \geq 1,4$ ), así como el cambio en cada prueba asociada con aumentos de 1 mmHg en la PAS, aumentos de 1 cm en la circunferencia de la cintura y en diabéticos comparado con no diabéticos.  $\eta_p^2$  representa el tamaño del efecto.
